# Supplementary material
Source: Springer Nature journal article supplement (https://www.springermedizin.de/resource/supplementary/12889_2007_1143_MOESM1_ESM.pdf/9502548)
Supplement: MOESM1 [file 9502548]

# INTERVENTION TEAM

Comprising representatives from the three partner organisations (CHA, URP, HB) plus the full-time project co-ordinator (March 2000 onwards).

LEVEL 1

Community sub group

Young people's sub group

Primary care sub group

Workplace sub group

Each comprising the project co-ordinator, intervention team representatives, and representatives from local organisations with a remit applicable to the setting.

LEVEL 2

Other community representatives/workers involved in taking forward project activities in each setting

LEVEL 3

-----  
THESE PARTS OF THE ORGANISATIONAL STRUCTURE WERE NOT FULLY OPERATIONALISED
